# Supplementary material for: Stress-induced RNA–chromatin interactions promote endothelial dysfunction
Source: PubMed Central journal article supplement (PMC7566596; doi:10.1038/s41467-020-18957-w), 2020-10-15
Supplement: 41467_2020_18957_MOESM1_ESM.pdf [file 41467_2020_18957_MOESM1_ESM.pdf]

## **Supplementary information**

### **Stress-induced RNA-chromatin interactions promote endothelial dysfunction**

Calandrelli, R. *et al.*

## Supplementary Figures and Tables

**Supplementary Figure 1.** Venn diagram of up- and down-regulated genes from scRNA-seq. Two-sided Wilcoxon test was used,  $P < 9.72e-27$  for Day 3 and  $P < 9.93e-115$  for Day 7.

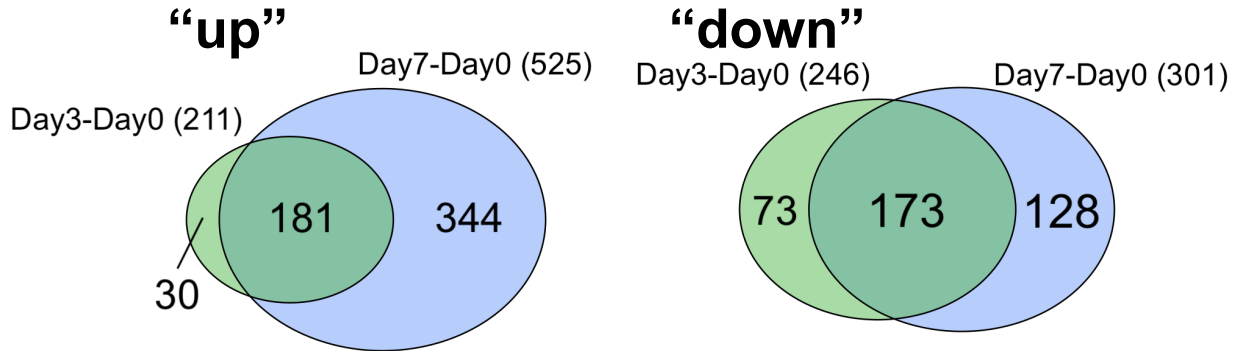

**Supplementary Figure 2.** HUVECs (at passage 5-6) were kept untreated (NT) or treated with TGF- $\beta$  (10 ng/ml) and IL-1 $\beta$  (5 ng/ml) (T+I) for 3 or 7 days. Cell morphology was captured by bright-field microscopy. Scale bar = 100  $\mu$ m. The cell treatment and microscopy were performed 3 times independently with similar observation. Representative images are presented.

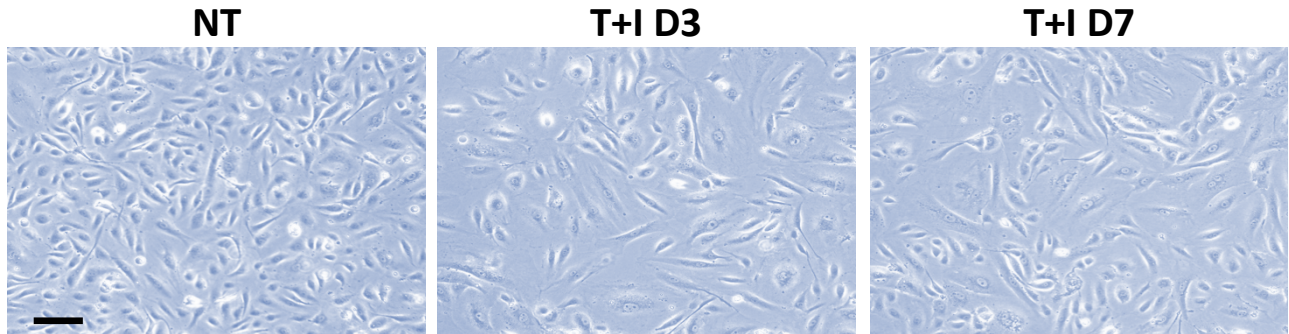

**Supplementary Figure 3.** Comparison of Hi-C derived genomic features in Day 0 (left), 3 (center), and 7 (right). (a) Pearson correlation matrix of the observed/expected contact matrix, reflecting A/B compartments in red and blue. Bottom: The first eigenvector of the Pearson correlation matrix. Resolution = 1 Mb. (b) Contact matrices of the entire Chromosome 6 at 1 Mb resolution (top row) and of the 80-120 Mb region on Chromosome 6 at 200 kb resolution (bottom row). (c) Measure of Concordance (MoC) between every two time points. The threshold for calling two Hi-C datasets “highly concordant” is  $\text{MoC} > 0.75$ .

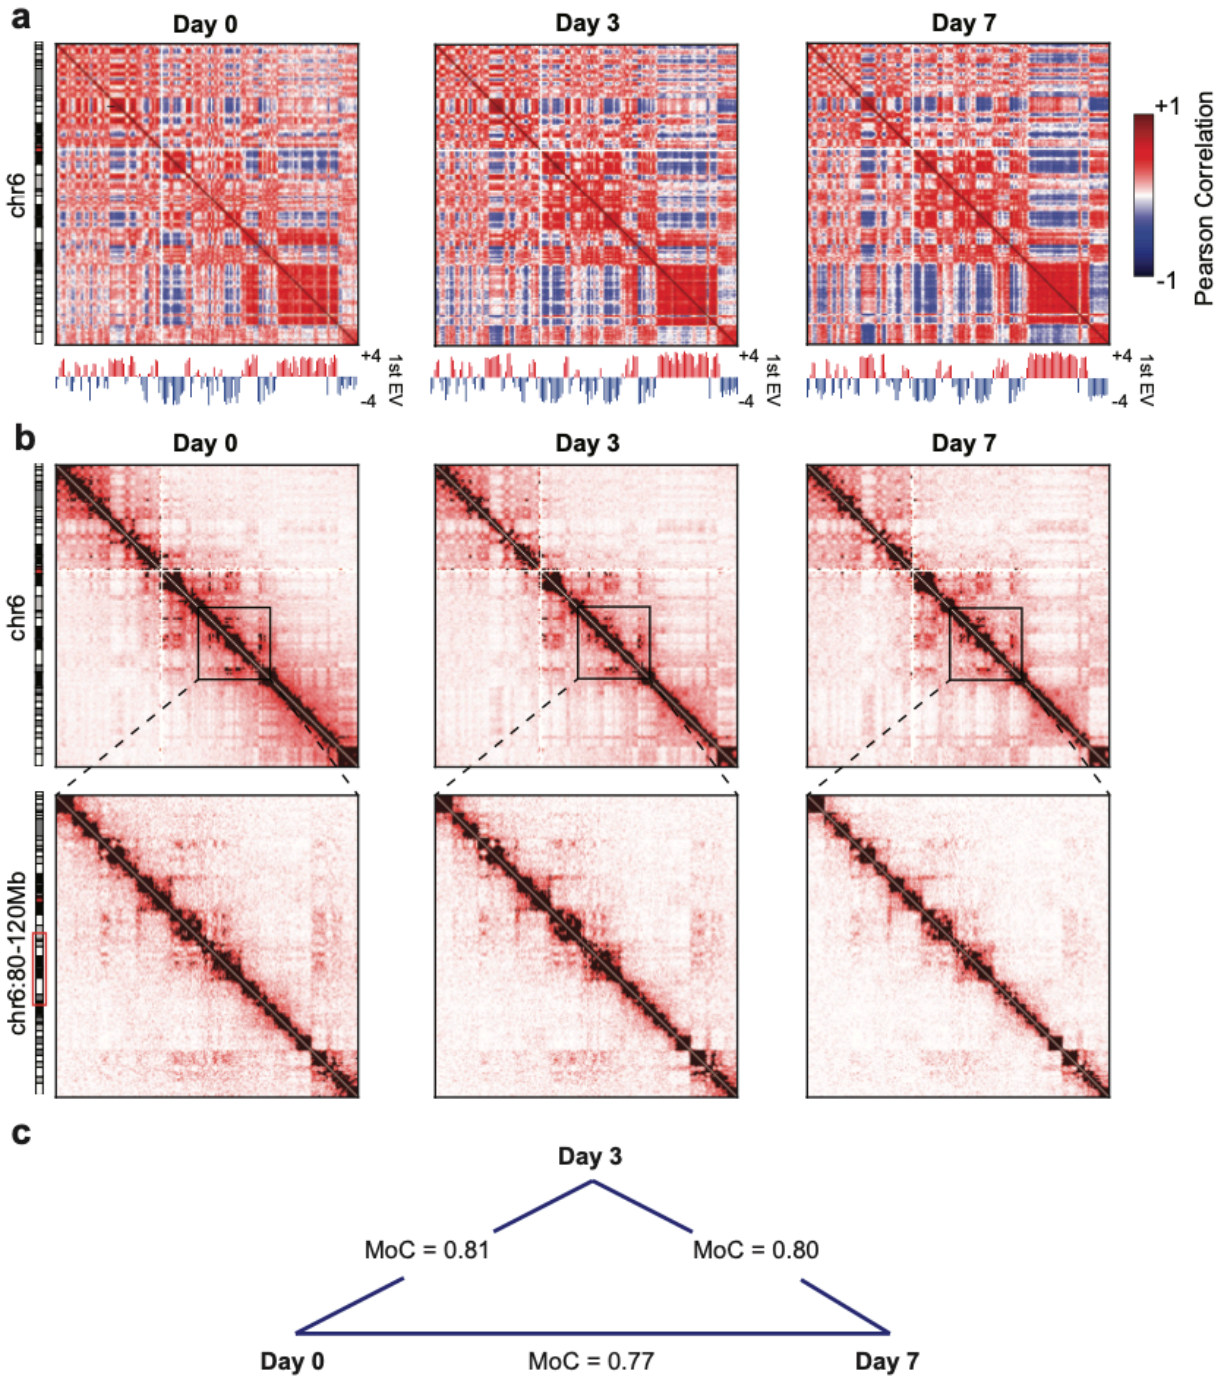

**Supplementary Figure 4. iMARGI read pairs and iMARGI derived interactions.** (a) Proportions of iMARGI read pairs with the RNA ends (pink) or the DNA ends (green) in Control (Ctrl) and H+T treated (Day 3 and 7 combined) ECs mapped to HUVEC enhancers. Dotted line: the relative size of HUVEC enhancers compared to the size of the genome. (b) Intra- (pink) and inter-chromosomal (green) number of SE pairs at Day 0 and Day 7. (c) Degree distribution (log-log plot) of the SEs in the identified SE RNA-chromatin interactions. The proportions (y axis) of SEs (nodes) in the Day 0 (pink), 3 (green), and 7 (blue) networks are plotted against the degrees of these SEs (x axis). (d,e) Inter- (d) and intra-chromosomal (e) RNA-chromatin interaction networks. Each node is a SE. Each edge is an interaction between two SEs. (f) Number of nodes in inter-chromosomal SE networks. Source data are provided as a Source Data file.

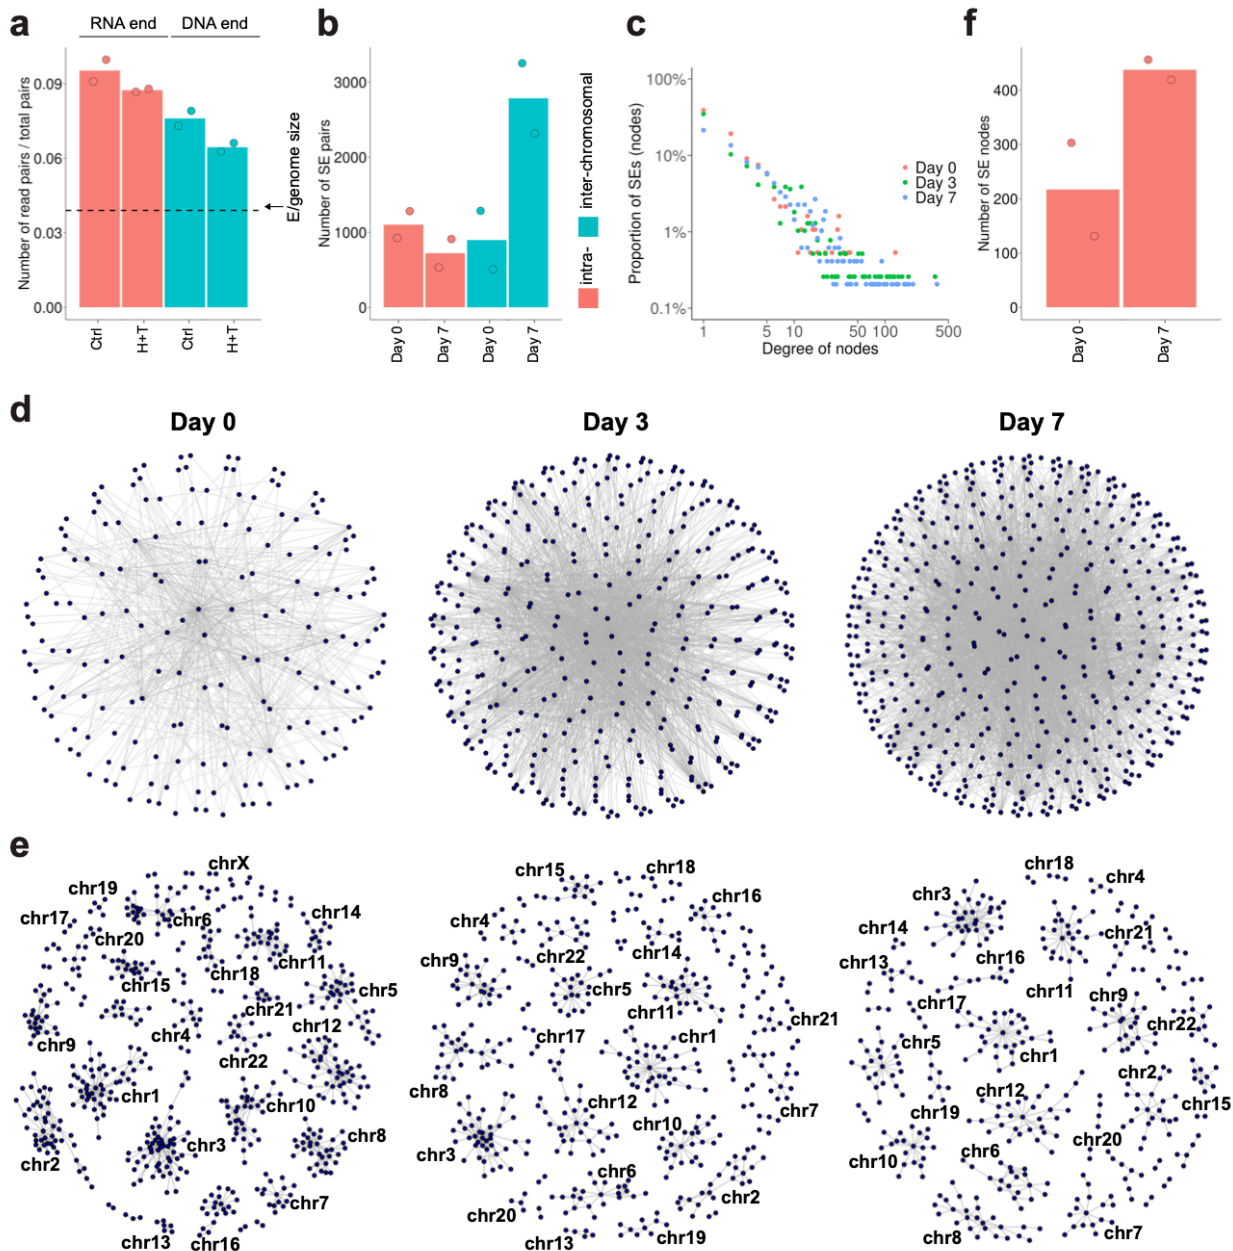

**Supplementary Figure 5. Reciprocal RNA-chromatin interactions between *Linc607SE* and *Serpine1SE*.** (a) Coverage plots of the *Linc607SE* RNA on the genomic region (chr7:80Mb-120Mb) containing the *Serpine1SE* (pink) from Day 0 (red), 3 (green), 7 (blue) ECs. Resolution = 200 kb. Read coverage = (number of read pairs / total pairs)  $\times 10^8$ . (b) iMARGI contact matrices from RNA on chromosome 7 (rows) to DNA on chromosome 2 (columns). Source data are provided as a Source Data file.

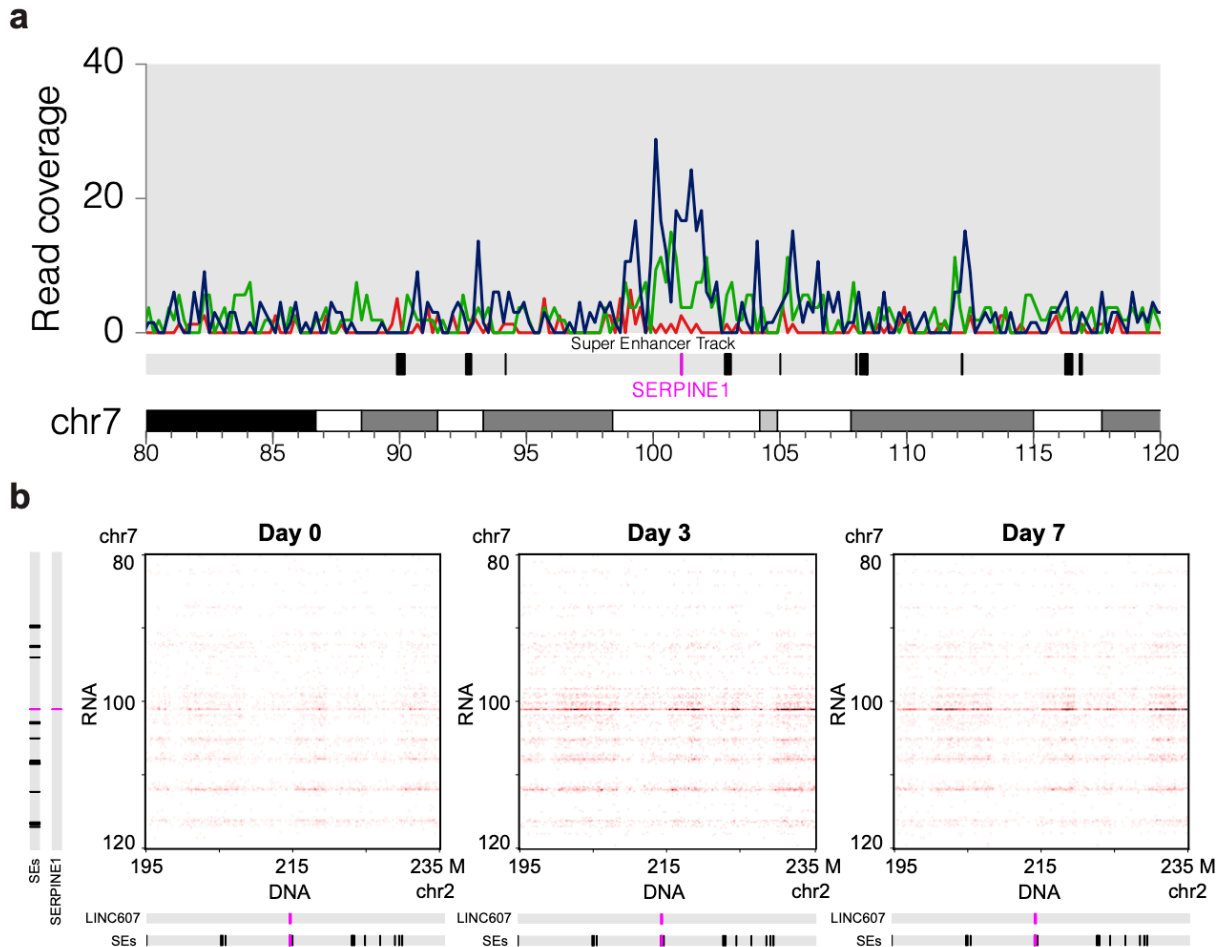

**Supplementary Figure 6. Basic information of LINC00607.** (a) Genomic feature of *LINC00607*. (b) Exon structure of LINC00607 transcripts (Ensembl). (c) RNA-seq reads of LINC00607 transcripts in HUVECs. The transcript examined in our study is highlighted in red. (d, e) HUVECs were treated as control or with H+T (HT) for 3 days. (d) qPCR of LINC00607 plotted as percentages in subcellular fractions. Data are represented as mean $\pm$ SEM from 5 independent experiments. (e) RNA FISH images of LINC00607 detected with a LNA probe (QIAGEN) labeled with 5'FAM (green). DRAQ5 was used for nuclear staining (blue). A 5'FAM-labeled probe with scramble sequence was used as a negative control, which did not show any significant signal (in f). Scale bar = 50  $\mu$ m. The RNA FISH for each condition was performed 3 times independently with similar observation. Representative confocal microscopic images are presented. Source data are provided as a Source Data file.

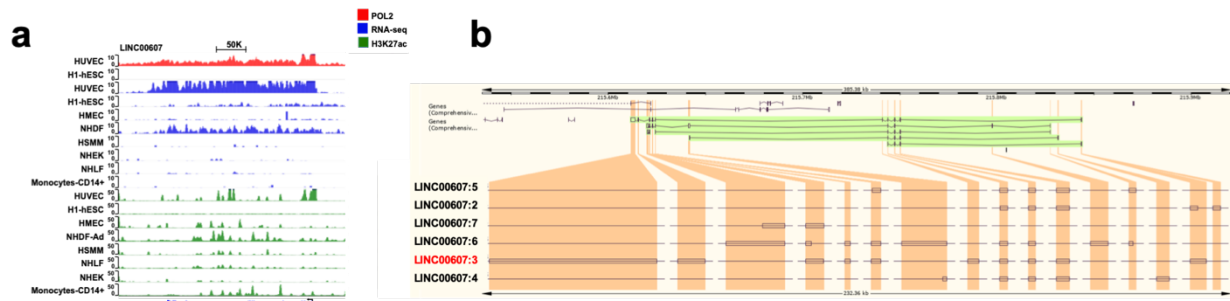

**c**

| Transcript ID      | Size (nt)   | # of Exons | Relative Expression in HUVECs (ENCODE) |             |                           |             |                           |              |                  |              |    |
|--------------------|-------------|------------|----------------------------------------|-------------|---------------------------|-------------|---------------------------|--------------|------------------|--------------|----|
|                    |             |            | Dataset 1: Whole cell (RPKM)           |             | Dataset 1: Cytosol (RPKM) |             | Dataset 1: Nucleus (RPKM) |              | Dataset 2 (FPKM) |              |    |
|                    |             |            | rep1                                   | rep2        | rep1                      | rep2        | rep1                      | rep2         | rep1             | rep2         |    |
| LINC00607:1        | 18176       | 12         | NA                                     | NA          | NA                        | NA          | NA                        | NA           | NA               | NA           | NA |
| LINC00607:2        | 558         | 5          | 0.06                                   | 0.05        | 0.04                      | 0.08        | 0                         | 0.07         | 7.5              | 7            |    |
| <b>LINC00607:3</b> | <b>3690</b> | <b>10</b>  | <b>5</b>                               | <b>5.04</b> | <b>4.41</b>               | <b>3.85</b> | <b>15.51</b>              | <b>14.24</b> | <b>16.78</b>     | <b>25.86</b> |    |
| LINC00607:4        | 581         | 5          | 0.21                                   | 0.81        | 0.16                      | 0.15        | 0.15                      | 0.14         | 11.46            | 4.74         |    |
| LINC00607:5        | 570         | 5          | 0.19                                   | 0.12        | 0.11                      | 0.11        | 0.1                       | 0.09         | 13.02            | 22.64        |    |
| LINC00607:6        | 2104        | 9          | 1.8                                    | 2.07        | 2.45                      | 2.03        | 4.2                       | 5.52         | 17.25            | 19.01        |    |
| LINC00607:7        | 526         | 2          | 2.63                                   | 2.14        | 1.96                      | 3.81        | 3.57                      | 3.38         | 0.47             | 0.69         |    |

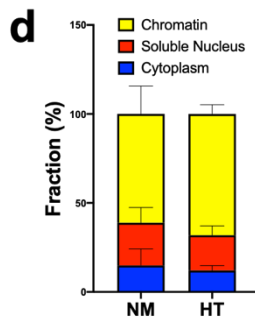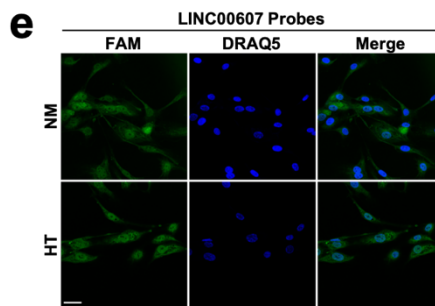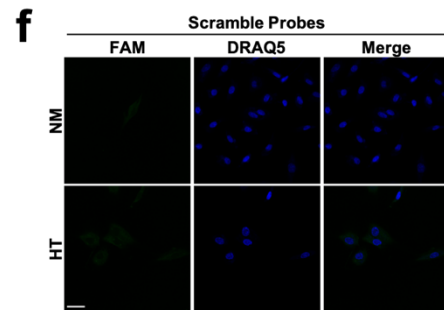

**Supplementary Figure 7. Global relaxation of intra-chromosomal DNA contacts in dysfunctional ECs.** (a) Distribution of Hi-C derived DNA contact frequencies (y axis) at Day 0 (red), 3 (green), 7 (blue) with respect to genomic distance (x axis). Bin size = 40 kb. (b) Distributions of proportions of reads mapped within TADs. Box plots show the median (center), the interquartile range (IQR, bounds of the box), minima and 75<sup>th</sup> percentile + 1.5 times IQR (whiskers), and maxima. Bin size = 40 kb. For fair comparisons, 190 million read pairs were randomly sampled from every Hi-C sequencing library for all analyses. Source data are provided as a Source Data file.

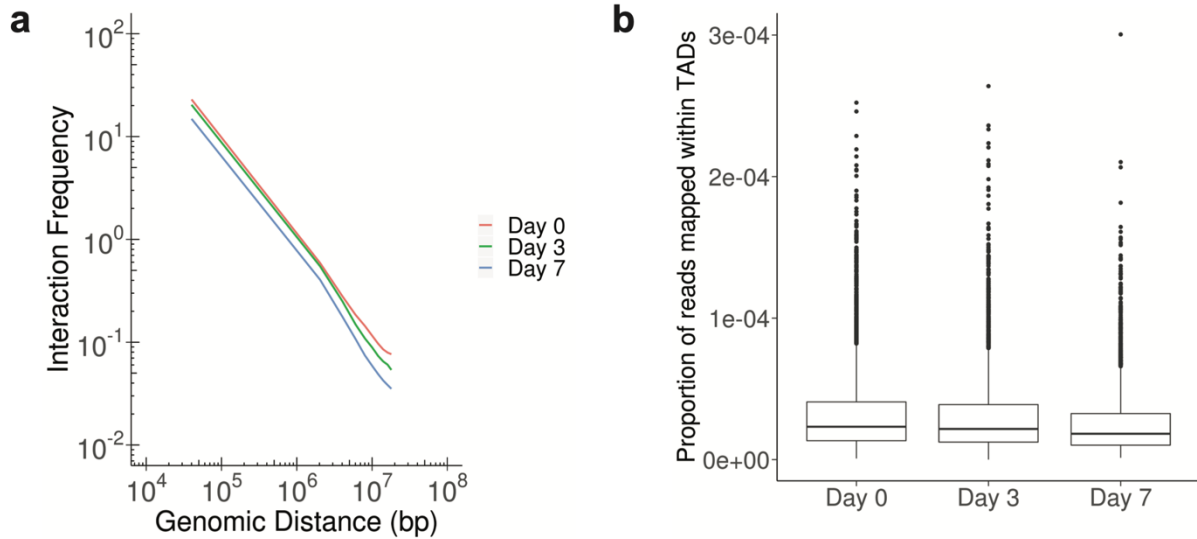

**Supplementary Figure 8. *Linc607SE* and *Serpine1SE* DNA FISH.** (a) Design of probes targeting chromosomal loci spanning *LINC00607* and *SERPINE1* SEs, as well as the negative control region. (b, c) Distances between *SERPINE1* genomic locus and *LINC00607* or the control region were measured in HUVECs treated with H+T at indicated time points. Representative images (in b) and quantification of DNA FISH based on 290, 285, and 190 cells per each group (in c). Nuclei were stained by DAPI; scale bar = 2  $\mu$ m. Arrow heads indicate example proximal pair. p-values were generated by non-parametric Wilcoxon-test with Bonferroni correction for multiple comparisons. \*\*\*\*  $P < 0.0001$  and \*  $P < 0.05$ . ns denotes not significant. Control = Day 0, D3 = Day 3, D7 = Day 7. Source data are provided as a Source Data file.

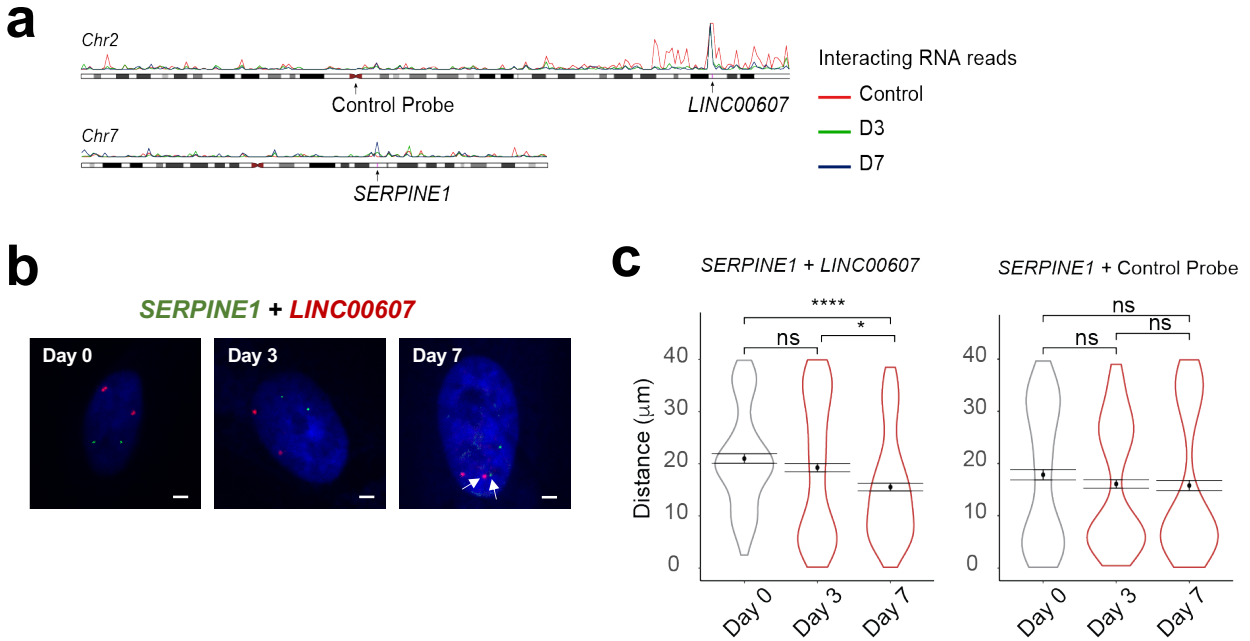



**Supplementary Figure 9. Effect of *LINC00607* overexpression (OE) in HUVECs.** A *LINC00607:3* isoform (most abundant and nucleus-localized transcript in HUVECs) was cloned into a pcDNA3.1(+) vector. HUVECs were transfected with either empty pcDNA3.1(+) plasmid (Empty vector) or plasmid containing *LINC00607* cDNA (0.6 µg per well in 6-well plates). Cells were harvested at 48 h post transfection. RNA levels of respective genes were quantified by qPCR. Data are represented as mean±SEM from 6 independent experiments. \**P* =0.0312 based on two-sided Wilcoxon test compared to empty vector control. Source data are provided as a Source Data file.

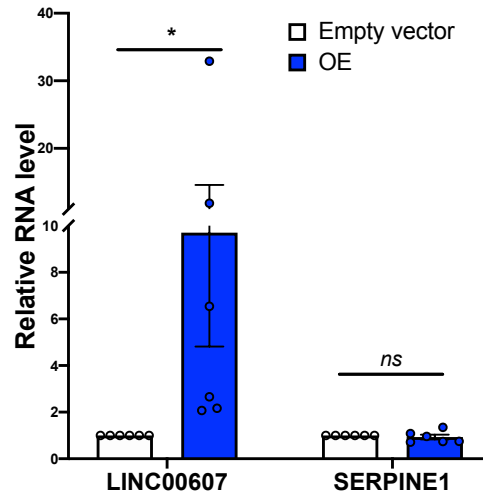

**Supplementary Figure 10. Reversal effect of H+T removal in ECs.** (a) Morphological changes of HUVECs upon mannitol (N+M 1d) or H+T treatment for 3 days (H+T 3d) followed by incubation in mannitol for 1 day (H3N1) or 3 days (H3N3). (b) Relative RNA levels of indicated mRNAs or LINC00607 under various treatments as shown in (a). Data are represented as mean±SEM from 4 independent experiments. \**P* = 0.01, 0.04, 0.05, 0.04, 0.03, 0.02, 0.002, 0.03 and 0.04 from left to right in (b) based on two-sided t-test between indicated groups. Source data are provided as a Source Data file.

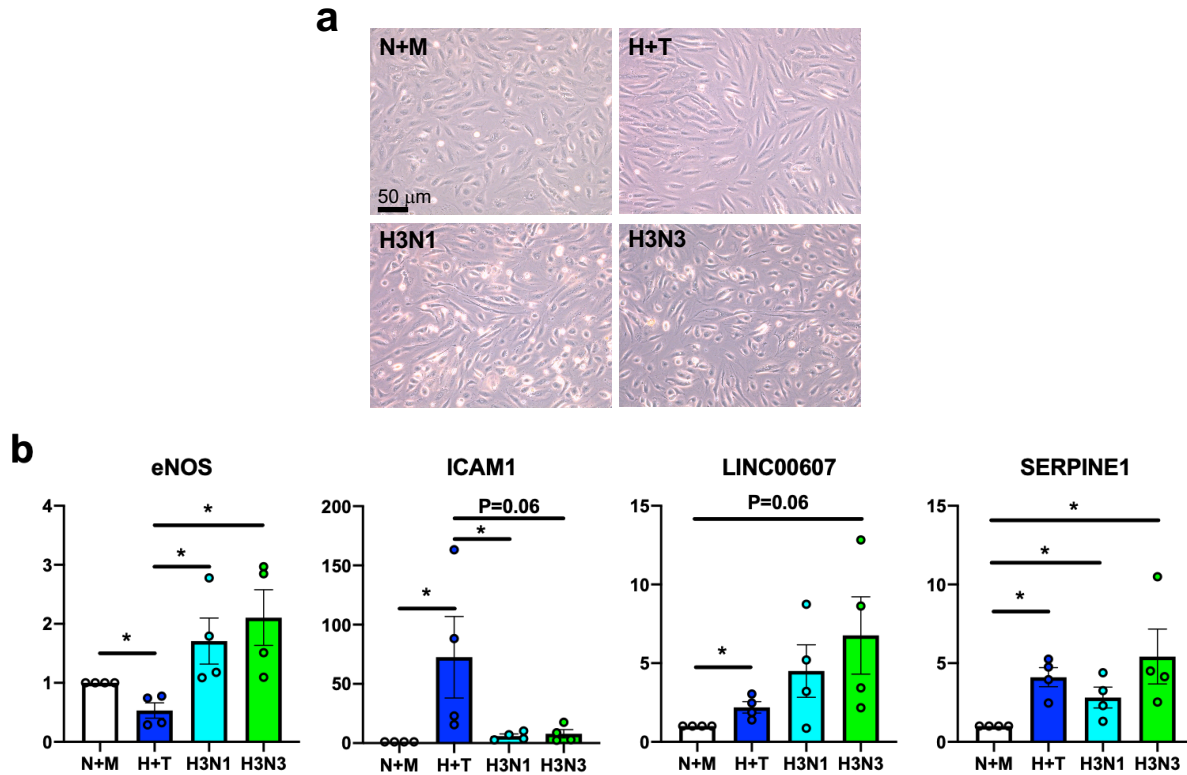

**Supplementary Figure 11. scRNA-seq data analysis of human donor-derived ECs.** Mesenteric arterial cells were isolated from 2 healthy (n) and 2 type 2 diabetic (T2D) donors for scRNA-seq. Number of cells sequenced are: n.1: 2249, n.2: 1875, T2D.1: 4286, T2D.2, 4405. (a) t-SNE plot showing the entire population of single cells. Cells from each patient type are not completely clustered together given the potential presence of several other cell types besides ECs (for example, smooth muscle cells, macrophages, monocytes, etc.). (b) t-SNE plot showing clusters identified by SNN clustering. (c) EC populations were identified by selecting clusters using *CDH5* expression. Source data are provided as a Source Data file.

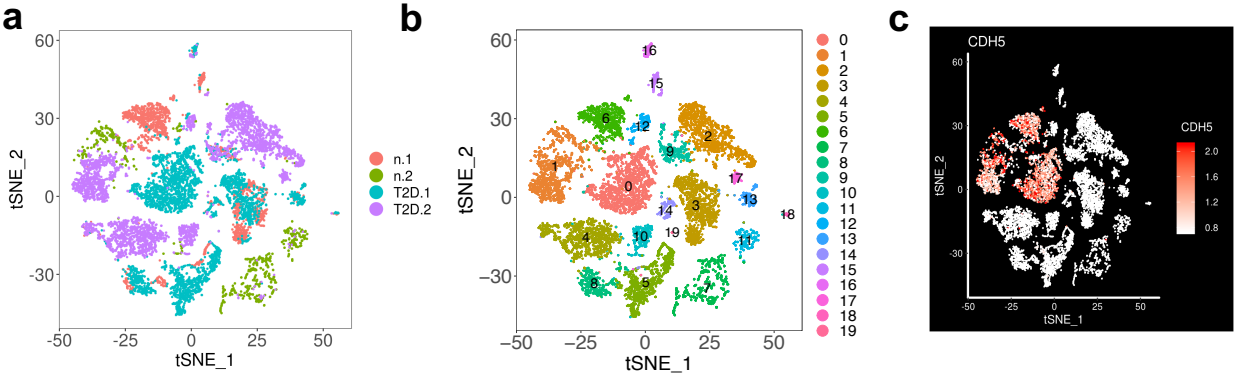

**Supplementary Table 1. Enriched pathways in DE genes related to EC dysfunction.**

Enriched pathway statistical analysis was performed using the functional annotation tool DAVID, which uses a modified one-sided Fisher Exact test. Thus, a modified Fisher Exact P-value is used in order to detect significant enrichment (modified P-value < 0.1).

| <b>Term</b>                                                           | <b>No. of genes</b> | <b>%</b> | <b>P-value</b> |
|-----------------------------------------------------------------------|---------------------|----------|----------------|
| GO:0007155~cell adhesion                                              | 43                  | 5.35     | 3.32E-06       |
| GO:0001525~angiogenesis                                               | 37                  | 4.60     | 6.02E-12       |
| GO:0006954~inflammatory response                                      | 35                  | 4.35     | 4.24E-05       |
| GO:0006955~immune response                                            | 32                  | 3.98     | 0.00252838     |
| GO:0098609~cell-cell adhesion                                         | 31                  | 3.86     | 2.04E-06       |
| GO:0001666~response to hypoxia                                        | 26                  | 3.23     | 8.91E-08       |
| GO:0030198~extracellular matrix organization                          | 23                  | 2.86     | 3.73E-05       |
| GO:0016477~cell migration                                             | 20                  | 2.49     | 1.53E-04       |
| GO:0050900~leukocyte migration                                        | 17                  | 2.11     | 6.66E-05       |
| GO:0007568~aging                                                      | 16                  | 1.99     | 0.00501572     |
| GO:0007179~transforming growth factor beta receptor signaling pathway | 15                  | 1.87     | 3.60E-05       |
| GO:0033209~tumor necrosis factor-mediated signaling pathway           | 14                  | 1.74     | 0.00166058     |
| GO:0006979~response to oxidative stress                               | 13                  | 1.62     | 0.0026811      |
| GO:0050776~regulation of immune response                              | 13                  | 1.62     | 0.08217528     |
| GO:0008286~insulin receptor signaling pathway                         | 12                  | 1.49     | 4.78E-04       |
| GO:0071260~cellular response to mechanical stimulus                   | 11                  | 1.37     | 8.64E-04       |
| GO:0034097~response to cytokine                                       | 10                  | 1.24     | 3.31E-04       |
| GO:0071356~cellular response to tumor necrosis factor                 | 10                  | 1.24     | 0.04704454     |
| GO:0007219~Notch signaling pathway                                    | 10                  | 1.24     | 0.05925478     |
| GO:0009749~response to glucose                                        | 9                   | 1.12     | 0.00846146     |
| GO:0050727~regulation of inflammatory response                        | 8                   | 1.00     | 0.01797915     |
| GO:0050729~positive regulation of inflammatory response               | 8                   | 1.00     | 0.03683555     |
| GO:0032869~cellular response to insulin stimulus                      | 8                   | 1.00     | 0.04706729     |
| GO:0045429~positive regulation of nitric oxide biosynthetic process   | 7                   | 0.87     | 0.00965174     |

|                                                                          |   |      |            |
|--------------------------------------------------------------------------|---|------|------------|
| GO:0071560~cellular response to transforming growth factor beta stimulus | 7 | 0.87 | 0.01784758 |
| GO:0007249~I-kappaB kinase/NF-kappaB signaling                           | 7 | 0.87 | 0.04320139 |
| GO:0038061~NIK/NF-kappaB signaling                                       | 7 | 0.87 | 0.06346437 |
| GO:0006006~glucose metabolic process                                     | 7 | 0.87 | 0.06730356 |
| GO:0070098~chemokine-mediated signaling pathway                          | 7 | 0.87 | 0.08397872 |
| GO:0090023~positive regulation of neutrophil chemotaxis                  | 6 | 0.75 | 0.00206053 |
| GO:0001974~blood vessel remodeling                                       | 5 | 0.62 | 0.04675183 |

**Supplementary Table 2. Summary of high-throughput datasets.**

| <b>Donor ID</b> | <b>Cell type</b>       | <b>Assay type</b> | <b>Treatment/Status</b> | <b># input cells</b> |
|-----------------|------------------------|-------------------|-------------------------|----------------------|
| <b>N/A</b>      | HUVEC                  | scRNA-seq         | NM control              | ~ 10,000             |
|                 |                        | scRNA-seq         | NM control              | ~ 10,000             |
|                 |                        | scRNA-seq         | H+T 3 days              | ~ 10,000             |
|                 |                        | scRNA-seq         | H+T 3 days              | ~ 10,000             |
|                 |                        | scRNA-seq         | H+T 7 days              | ~ 10,000             |
|                 |                        | scRNA-seq         | H+T 7 days              | ~ 10,000             |
|                 |                        | Hi-C              | NM control              | ~ 1 million          |
|                 |                        | Hi-C              | H+T 3 days              | ~ 1 million          |
|                 |                        | Hi-C              | H+T 7 days              | ~ 1 million          |
|                 |                        | iMARGI            | NM control              | ~ 3 million          |
|                 |                        | iMARGI            | NM control              | ~ 3 million          |
|                 |                        | iMARGI            | H+T 3 days              | ~ 3 million          |
|                 |                        | iMARGI            | H+T 7 days              | ~ 3 million          |
|                 |                        | iMARGI            | H+T 7 days              | ~ 3 million          |
| <b>HC-1</b>     | Mesenteric arterial EC | scRNA-seq         | Healthy                 | ~ 10,000             |
| <b>HC-1</b>     |                        | scRNA-seq         | Healthy                 | ~ 10,000             |
| <b>T2D-1</b>    |                        | scRNA-seq         | Dysfunctional           | ~ 10,000             |
| <b>T2D-2</b>    |                        | scRNA-seq         | Dysfunctional           | ~ 10,000             |

**Supplementary Table 3. H+T-induced SE hubs.** The ordered number of the SE (Index), the first time that this SE becomes a hub in the H+T treatment time course (Emerging time point), and the genes contained in the SE, including coding, lincRNA, and pseudogene genes. The genes known to be related to EC dysfunction are marked in red.

| Index | Emerging time point | Genes contained in this SE                                                                                                                     |
|-------|---------------------|------------------------------------------------------------------------------------------------------------------------------------------------|
| 557   | Day 0               | <b>MALAT1</b> ; AP000769.7;<br>AP000769.1                                                                                                      |
| 23    | Day 3               | MACF1                                                                                                                                          |
| 216   | Day 3               | <b>FNDC3B</b>                                                                                                                                  |
| 253   | Day 3               | <b>TRIO</b> ; AC016549.1                                                                                                                       |
| 391   | Day 3               | TRIM56; <b>SERPINE1</b>                                                                                                                        |
| 438   | Day 3               | <b>EXT1</b>                                                                                                                                    |
| 442   | Day 3               | <b>PVT1</b>                                                                                                                                    |
| 469   | Day 3               | PALM2; PALM2-AKAP2;<br>AKAP2                                                                                                                   |
| 503   | Day 3               | N/A                                                                                                                                            |
| 548   | Day 3               | RNA5SP335; NAV2-AS3                                                                                                                            |
| 556   | Day 3               | <b>NEAT1</b>                                                                                                                                   |
| 682   | Day 3               | <b>THBS1</b>                                                                                                                                   |
| 692   | Day 3               | <b>SMAD3</b>                                                                                                                                   |
| 840   | Day 3               | <b>RUNX1</b> ; AF015262.2;<br>AF015720.3; AP000687.1                                                                                           |
| 217   | Day 7               | NLGN1                                                                                                                                          |
| 219   | Day 7               | EIF2B5; DVL3; AP2M1; ABCF3;<br>VWA5B2; ALG3; ECE2;<br>CAMK2N2; PSMD2; EIF4G1;<br>FAM131A; CLCN2; POLR2H;<br>THPO; CHR1; RP11-433C9.2;<br>EPHB3 |
| 264   | Day 7               | <b>PDE4D</b> ; NDUFB4P2; SETP21;<br>PART1                                                                                                      |
| 328   | Day 7               | CASC15; NBAT1                                                                                                                                  |
| 470   | Day 7               | PALM2; PALM2-AKAP2;<br>AKAP2                                                                                                                   |
| 583   | Day 7               | <b>VWF</b>                                                                                                                                     |
| 632   | Day 7               | NCOR2; RP11-83B20.1                                                                                                                            |
| 658   | Day 7               | SAMD4A                                                                                                                                         |
| 694   | Day 7               | THSD4; CT62                                                                                                                                    |
| 733   | Day 7               | ANKRD11                                                                                                                                        |
| 794   | Day 7               | SIPA1L3                                                                                                                                        |

**Supplementary Table 4. Information of donors for human mesenteric arterial EC isolation.**

| <b>Donor ID</b> | <b>HbA1c</b> | <b>Donor info</b>                              |
|-----------------|--------------|------------------------------------------------|
| HC-1            | 5.4%         | Caucasian, Male, 59, BMI 28.2                  |
| HC-2            | 5.5%         | Hispanic, Male, 28, BMI 21.0                   |
| T2D-1           | 9.5%         | Hispanic, Female, 42, BMI 40.3;<br>T2D> 10yr   |
| T2D-2           | 6.9%         | Hispanic, Male, 46, BMI 45.8;<br>Untreated T2D |



**Supplementary Table 5. List of genes embedded in emergent LINC00607-interacting SEs and of which expression is suppressed in H+T-treated ECs with LINC00607 LNA1. Y/N in the last column indicates the embedded hub is or is not a hub SE.**

| SE Index | Gene     | Hub SE |
|----------|----------|--------|
| 366      | PRKAR1B  | N      |
| 461      | TRMT10B  | N      |
| 506      | CUBN     | N      |
| 253      | TRIO     | Y      |
| 391      | TRIM56   | Y      |
| 391      | SERPINE1 | Y      |
| 652      | COL4A1   | N      |
| 652      | COL4A2   | N      |
| 694      | THSD4    | Y      |
| 794      | SIPA1L3  | Y      |
| 279      | ERAP1    | N      |
| 328      | CASC15   | Y      |
| 222      | LPP      | N      |
| 632      | NCOR2    | Y      |

**Supplementary Table 6. Sequences of qPCR primers, LNA GapmeRs, information of DNA and RNA FISH probes.**

| qPCR primers  | Forward               | Reverse                |
|---------------|-----------------------|------------------------|
| LINC00607     | ACCGGGCGTTGAGAATACAA  | ACACTTGGCGAAACTTCCCT   |
| eNOS          | TGATGGCGAAGCGAGTGAAG  | ACTCATCCATACACAGGACCC  |
| ICAM1         | GTGTCCTGTATGGCCCCGACT | ACCTTGCGGGTGACCTCCCC   |
| ACTB          | CATGTACGTTGCTATCCAGGC | CTCCTTAATGTCACGCACGAT  |
| SERPINE1      | AGTGGACTTTTCAGAGGTGGA | GCCGTTGAAGTAGAGGGCATT  |
| $\alpha$ -SMA | CAGGGCTGTTTTCCCATCCAT | GCCATGTTCTATCGGGTACTTC |

| LNAs     | Sequence         | Position (NR_037195.1) |
|----------|------------------|------------------------|
| LNA-1    | ATAGGTCACGCATTCT | 210-225                |
| LNA-2    | CAACTGTGGAATGATA | 2033-2048              |
| Scramble | AACACGTCTATACGC  |                        |

| SKU         | DNA FISH Probes                                          | Chromosome coordinate (Hg38) |
|-------------|----------------------------------------------------------|------------------------------|
| CLN-1008    | Clone Library: RPCI-11                                   | Chr2:216224988-216402549     |
|             | Clone Name: 946O2                                        |                              |
|             | Dye Color: Orange 5-TAMRA dUTP                           |                              |
| CLN-1004    | Clone Library: RPCI-11                                   | Chr7:100405127-100578561     |
|             | Clone Name: 954P20                                       |                              |
|             | Dye Color: Green 5-Fluorescein dUTP                      |                              |
| CHR02-10-RE | Chromosome 02 Control Probe<br>Dye Color: Red 5-ROX dUTP | Chr2:93900000-96000000       |

| RNA FISH Probe  | Sequence         | Position (NR_037195.1) |
|-----------------|------------------|------------------------|
| LINC00607 probe | ATAGGTCACGCATTCT | 210-225                |
